# Supplementary material
Source: publisher figshare collection journal article supplement (https://acs.figshare.com/ndownloader/files/4439536)
Supplement: Supplementary file 1 [file 4439536]

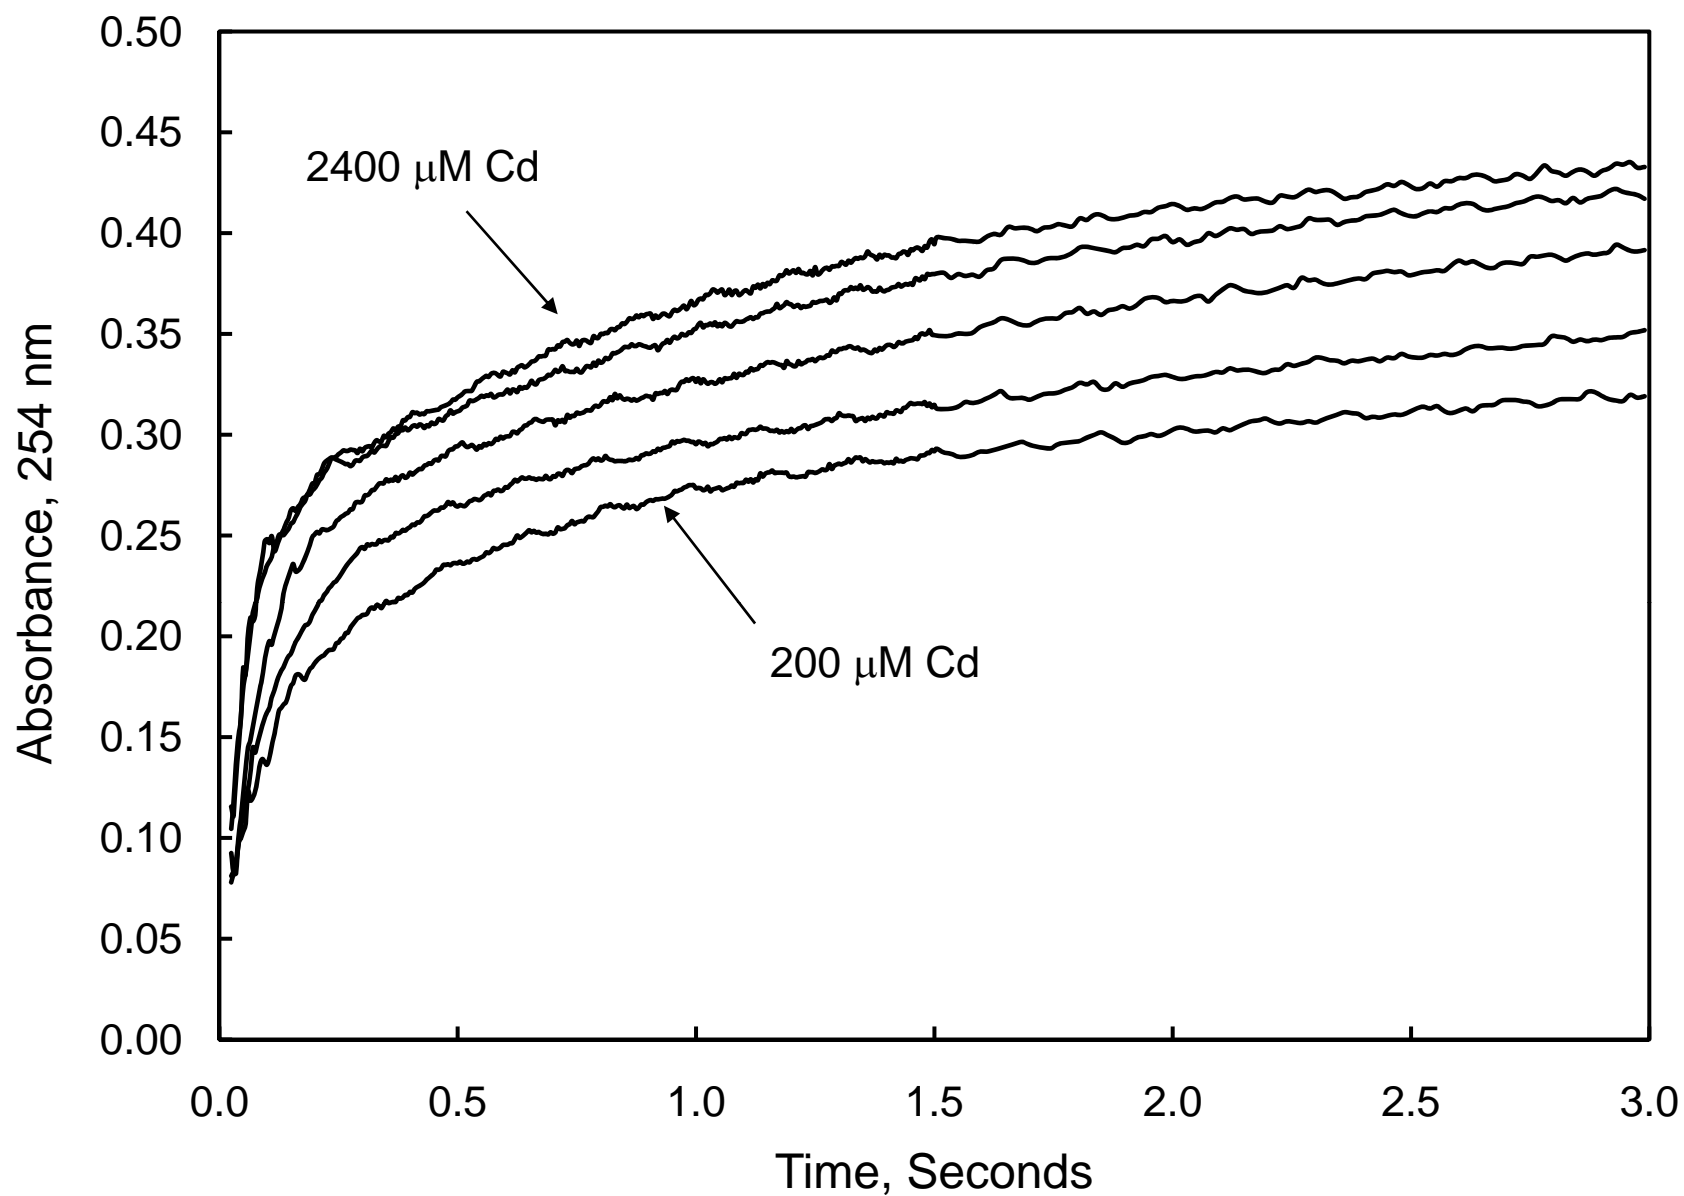

**Figure 2S** Metal exchange reaction between  $\text{Zn}_7\text{-}\alpha\text{MT-2}$  and  $\text{Cd}^{2+}$  at 200, 400, 800, 1600, and 2400  $\mu\text{M}$   $\text{Cd}^{2+}$  in 10 mM Tris-Cl, pH 7.4, and 0.1 M KCl at 25° observed at 254 nm. The figure shows the first 3 seconds of the reactions.
